# Supplementary material for: Impacts of COVID-19 Pandemic and Its Lockdown on Global Eating Behavior: A Google Trends Analysis
Source: Preprints.org preprint supplement (doi:10.20944/preprints202012.0701.v1), 2020-12-28
Supplement: Supplementary file 1 [file supplementary]

**Supplement 1: The checklist for documentation of Google Trends searches, suggestion from Nuti et al.**

| Section/Topic | Checklist item |
| --- | --- |
| Search Variables |  |
| Access Date | 15 December 2020 |
| Period | From January 1, 2018, to December 13, 2020 |
| Query Category | Search term |
| Region | Worldwide |
| Countries with Low Search Volume | Excluded |
| Search Input |  |
| Full search input | (1) Coronavirus: “coronavirus” for correlation analysis  (2) Environmental and economic factors:   - Food security: “food security”, “food shortage”, “food bank”, “free food”, “free meal” - Individual economics: “Job”, “Unemployment”, “Money”, “Tax”, “Price”   (3) Health- and food-safety concerns   - Food safety: “Food storage containers”, “Food safety”, “Food poisoning”, “Food packaging”, “Sanitation” - Immune-boosting nutrients: “Vitamin”, “Vitamin C”, “Vitamin D”, “Zinc”, “Immunity”   (4) Food choices and preferences   - Starchy food: “Rice”, “Bread”, “Pasta”, “Potato”, “Flour” - Meat: “Beef”, “Pork”, “Chicken”, “Egg”, “Fish” - Milk and dairy products: “Milk”, “Ice cream”, “Yogurt”, “Cheese”, “Butter” - Vegetables and fruits: “Fruit”, “Vegetable”, “Mushroom”, “Bean”, ”Lentil” - Cooking-oil: “Olive oil”, “Coconut oil”, “Palm oil”, “Lard”, “Soybean oil” - Canned foods: “Canned soup”, “Canned meat”, “Canned fish”, “Canned tomato”, “Baked beans” - Sugary foods: “Cake”, “Cookie”, “Chocolate”, “Pancake”, “Tart” - Alcoholic beverages: “Bar”, “Party”, “Beer”, “Wine”, “Liquor” - Food types: “Fresh food”, “Canned food”, “Frozen food”, “Dried food”, “Cold food” - Food sourcing: “Local food”, “Local farm”, “Community-supported agriculture”, “Local fruit”, “Local meat”   (5) Social factors: “Restaurant”, “Delivery”, “Take-out”, “Recipe”, “Cooking”  (6) Individual factors: “Weight loss”, “Calorie”, “Weight gain”, “Aerobic exercise”, “Weight”  (7) Lifestyle factors   - Food purchasing: “Grocery store”, “Supermarket”, “Market”, “Shopping mall”, “Online shopping” - Physical activities: “Running”, “Walking”, “Gym”, “Cycling”, “Swimming” - Sports equipment: “Health club”, “Yoga mat”, “Treadmill”, “Stationary bicycle”, “Dumbbell” - Leisure activities: “Movie theater”, “Concert”, “Video game”, “Book”, “Music”   (8) Psychological aspects: “Insomnia”, “Depression”, “Isolation”, “Boredom”, “Anxiety” |
| Quotation Marks | If there was one word in the search term, those words were queried with quotation marks |
| The rationale for Search Strategy |  |
| For Search Input | The searched terms were related to change in human eating behavior and its related factors during the year presence of COVID-19 (January 2020 till December 13, 2020), which compared with the similar period in the previous of two reference years (years without the presence of COVID-19 - The year 2018 and 2019) |
| For Setting Chosen | Web search was chosen |
| Hypothetical example |  |
| On December 15, 2020, we queried Google Trends and downloaded the data for the above search input. We searched the worldwide data from January 1, 2018, to December 13, 2020, with no restriction on the query category. We search those terms based on the hypothesis that our eating behavior and its related factors may change since the Covid-19 pandemic, including the lockdown period and lockdown easement period. We select the period before Covid-19 starting from January 1, 2018, till December 31, 2019, as a reference period (stable periodically year) to compare with the trending during the Covid-19 outbreak occurred. | |
